# Supplementary material
Source: PubMed Central journal article supplement (PMC4214426)

## Supplementary Information

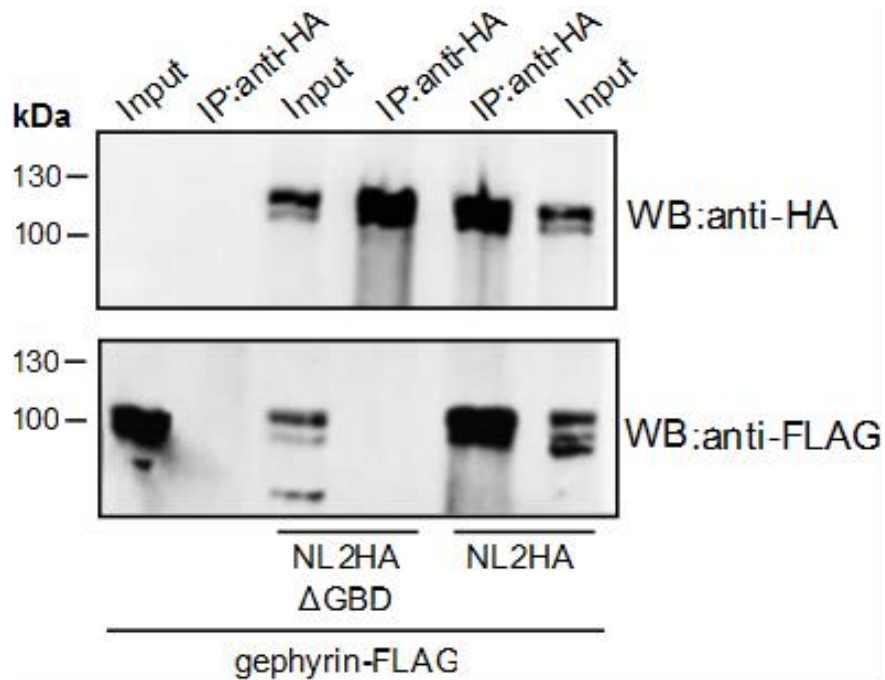

**Supplementary Figure 1. NL2 lacking the gephyrin binding domain does not interact with gephyrin.** Representative IP of HA epitopes from samples of HEK293 cells co-expressing gephyrin-FLAG and NL2HA or NL2HA- $\Delta$ GBD. IP was also performed on gephyrin-FLAG single transfected cells as a negative control. Nitrocellulose membranes were probed with anti-HA and anti-FLAG antibodies. Gephyrin-FLAG interaction with NL2HA is completely abolished upon removal of the GBD.

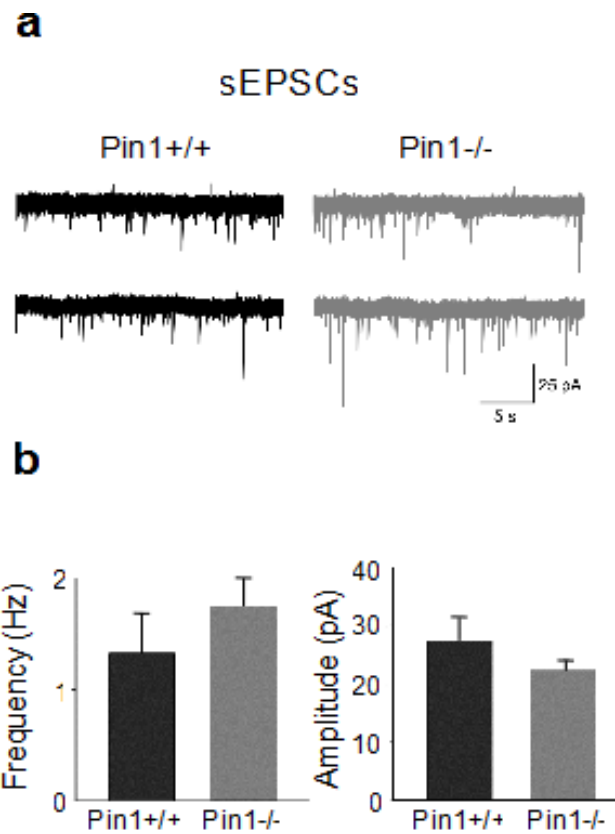

**Supplementary Figure 2. Pin1 does not affect the amplitude or frequency of sEPSCs.** **a)** Samples traces of sEPSCs recorded in the presence of the GABA<sub>A</sub> receptor antagonist PTX 100  $\mu$ M from a CA1 principal cells at P11 in hippocampal slices from Pin1+/+ (black) and Pin1-/- mice (gray), n=6 for both genotypes. **b)** Each column represents the mean frequency and amplitude values of sEPSCs recorded from WT (black, n=6) and Pin-/- mice (gray, n= 6).  $P > 0.05$ , Student's *t*-test.

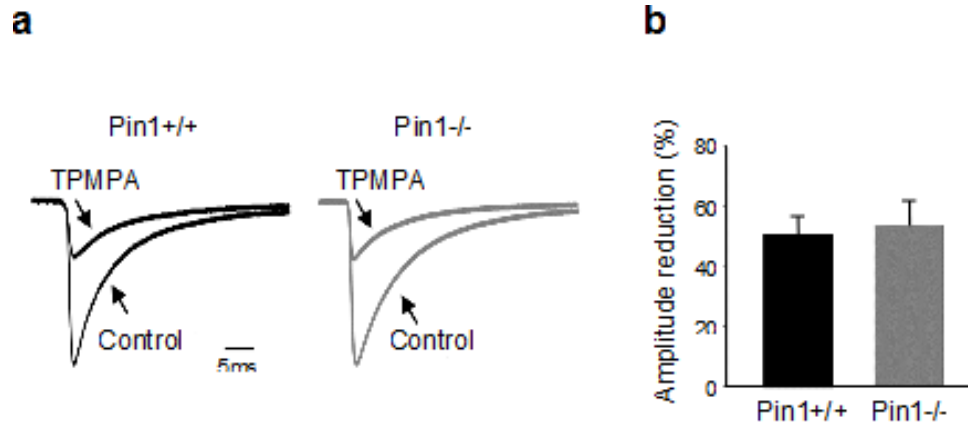

**Supplementary Figure 3. Pin1 does not affect GABA transient in the cleft. a)** Sample traces of sIPSCs recorded from Pin1<sup>+/+</sup> (black) and Pin1<sup>-/-</sup> mice (gray), in the absence (Control) and in the presence of TPMPA (200  $\mu$ M). The amplitudes of sIPSCs from Pin1<sup>-/-</sup> mice were normalized to those obtained from control littermates. **b)** Each column represents the mean TPMPA-induced reduction of sIPSCs amplitude in Pin1<sup>+/+</sup> (black; n=4) and Pin1<sup>-/-</sup> mice (gray; n=5).  $P > 0.05$ ; one-way ANOVA and Bonferroni post test for multi comparison analysis between groups

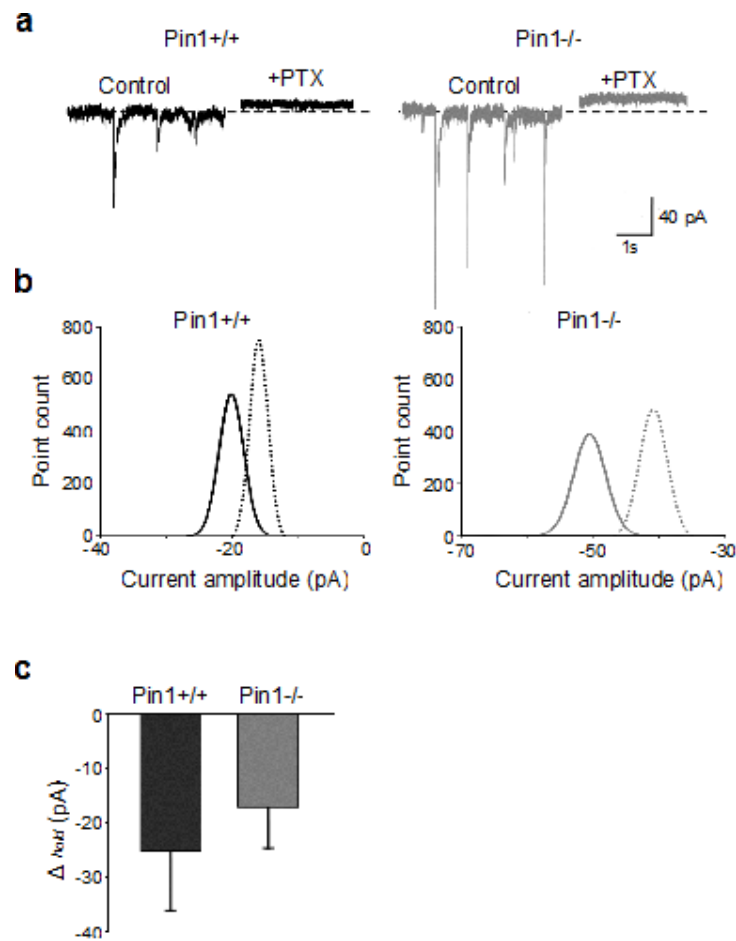

**Supplementary Figure 4. Pin does not affect extrasynaptic GABA<sub>A</sub> Receptors.** a) Representative traces of spontaneous IPSCs recorded from a CA1 pyramidal cell in hippocampal slice obtained from Pin1<sup>+/+</sup> (black) and Pin1<sup>-/-</sup> mice (gray) before and during application of picrotoxin (PTX, 100  $\mu$ M). b) All-point histogram of 5 ms traces from the cells recorded in a, before (dotted lines) and during (continuous lines) bath application of PTX in Pin1<sup>+/+</sup> (black) and Pin1<sup>-/-</sup> mice (gray). Pin1<sup>+/+</sup> n=6 and Pin1<sup>-/-</sup> mice n= 7.  $P > 0.05$ , Mann-Whitney test . c) Summary data of tonic currents obtained from both genotyping.

**Figure 1b**

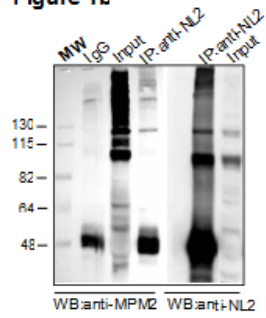

**Figure 1c**

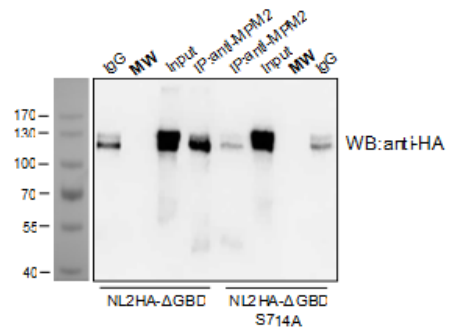

**Figure 1d**

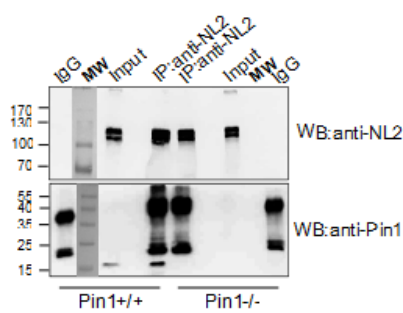

**Figure 1e**

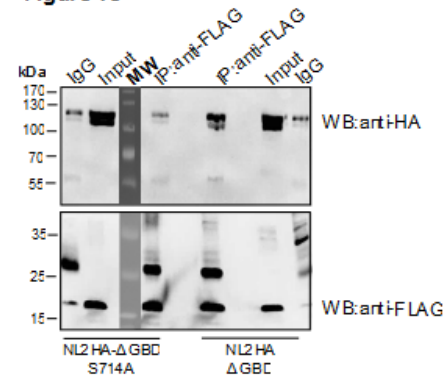

**Figure 2a**

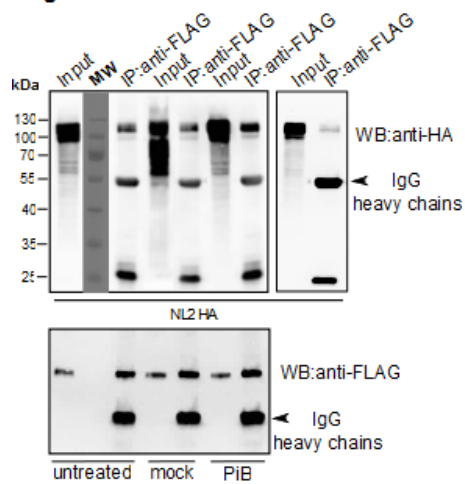

**Figure 2b**

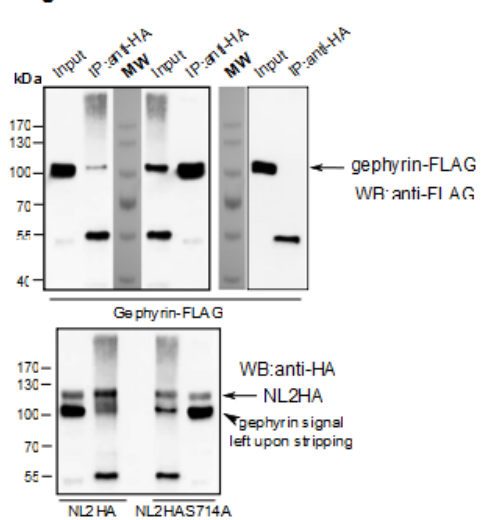

**Supplementary Figure 5.** Full images of western blot displayed in cropped format in figures 1, 2, 3, 4 and 5 (continued below)

**Figure 2c**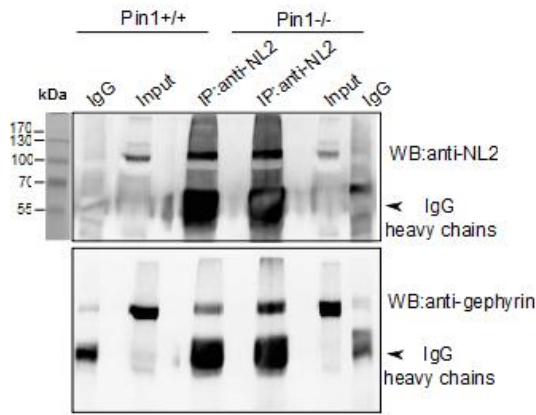**Figure 2d**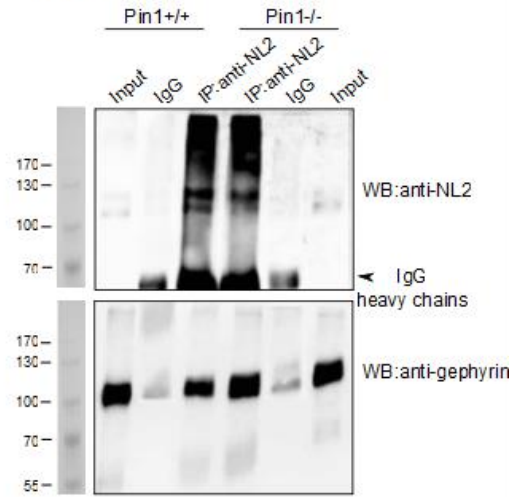**Figure 3c**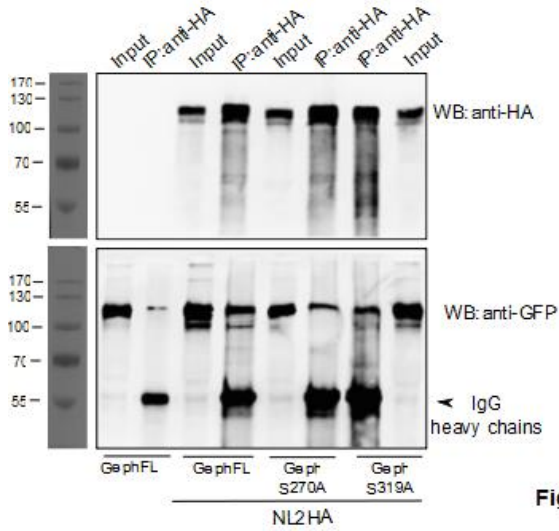**Figure 4a**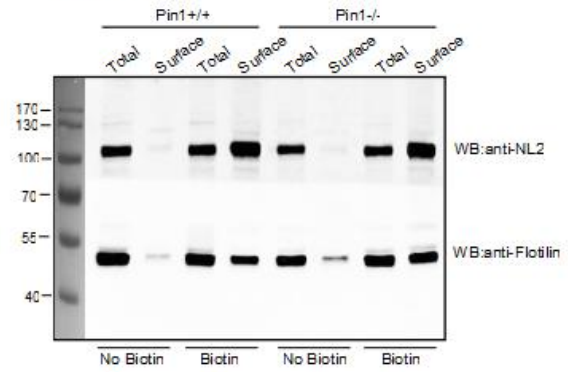**Figure 5a**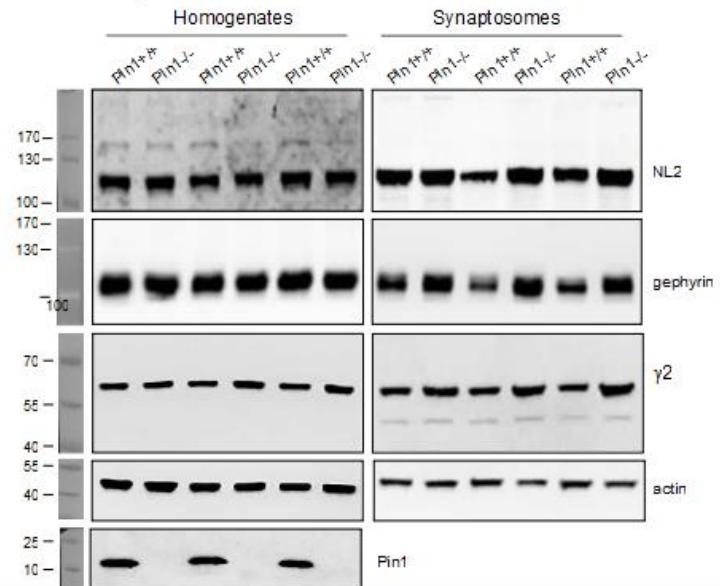

Supplement: ncomms6066-s1.pdf [file ncomms6066-s1.pdf]
